# Supplementary material for: Ornithine cyclodeaminase/μ-crystallin homolog from the hyperthermophilic archaeon Thermococcus litoralis functions as a novel Δ1-pyrroline-2-carboxylate reductase involved in putative trans-3-hydroxy-l-proline metabolism
Source: PubMed Central journal article supplement — FEBS Open Bio. 2014 Jul 10;4:617–26. doi: 10.1016/j.fob.2014.07.005 (PMC4141209; doi:10.1016/j.fob.2014.07.005), 2014-07-10
Supplement: mmc1.pdf [file mmc1.pdf]

### Supplementary methods

Among three OCD-like genes from *T. litoralis* DSM 5473, *T. sibiricus* MM 739, and *K. cryptofilum*, clustered with putative T3LHyp dehydratase genes, only the gene from *T. litoralis* DSM 5473 consisted of two separate open-reading frames (ORFs): OCC\_00362 and OCC\_00367 (*red* and *blue* in the following scheme). On the other hand, all known OCD/CRYM superfamily enzymes are encoded by a single ORF, such as genes from *T. sibiricus* (TSIB\_0634) and *K. cryptofilum* (Kcr\_0796) (see Fig. 1D). In fact, we found that when a single “A” is inserted between A227646 and T227647 in the original genome sequence of *T. litoralis* DSM 5473 (underlined lower case letter), the separate ORFs fuse into a single ORF, and the putative amino acid sequence of (*green*) is clearly homologous to that of the TSIB\_0634 gene (*orange*). There are two possibilities from these preliminary analyses. An error in the genome sequence was not found in the sequencing. Although there is another possibility that this OCD-like protein from *T. litoralis* DSM 5473 forms a heterooligomeric structure, we synthesized the *TLLhpI* gene as a single ORF by sequential steps of PCR [1] using sense and antisense primers (Table S1) and genome DNA of *T. litoralis* DSM 5473 as a template.

1. Penning TM & Jez JM (2001) Enzyme redesign. *Chem Rev* **101**, 3027-3046.

OCC\_00362

OCC\_00367

T A R E P V V K G D G L G K A R T S T P \*

(M) R K S K L V

ACGGCAAGAGAACCAGTAGTTAAGGGGGATGGATTAGGGAAGGCACGCACATCAACTCCGTAGGCTGGGTGGGAGAGATGCCAGGGAACCGATTCCGAAACAGTGAGAAAGTCTAAGCTGGTT

ACGGCAAGAGAACCAGTAGTTAAGGGGA<sub>a</sub>TGGATTAGGGAAGGCACGCACATCAACTCCGTAGGCTGGGTGGGAGAGATGCCAGGGAACCGATTCCGAAACAGTGAGAAAGTCTAAGCTGGTT

T A R E P V V K G E W I R E G T H I N S V G W V G R D A R E L D S E T V R K S K L V

ACTGCAAAGAACCCTGATTAAGGGAGAATGGATCAAAGAAGGCACGCACATAAATTCTATAGGGTGGATGGGAAAAGATGCCAGAGAACCGATTCCGAAACAGTAAGAAAGTCCAAACTGGTC

T A K E P V I K G E W I K E G T H I N S I G W M G K D A R E L D S E T V R K S K L V

TSIB\_0634
