# Supplementary material for: Ornithine cyclodeaminase/μ-crystallin homolog from the hyperthermophilic archaeon Thermococcus litoralis functions as a novel Δ1-pyrroline-2-carboxylate reductase involved in putative trans-3-hydroxy-l-proline metabolism
Source: PubMed Central journal article supplement — FEBS Open Bio. 2014 Jul 10;4:617–26. doi: 10.1016/j.fob.2014.07.005 (PMC4141209; doi:10.1016/j.fob.2014.07.005), 2014-07-10
Supplement: mmc2.pdf [file mmc2.pdf]

**A**

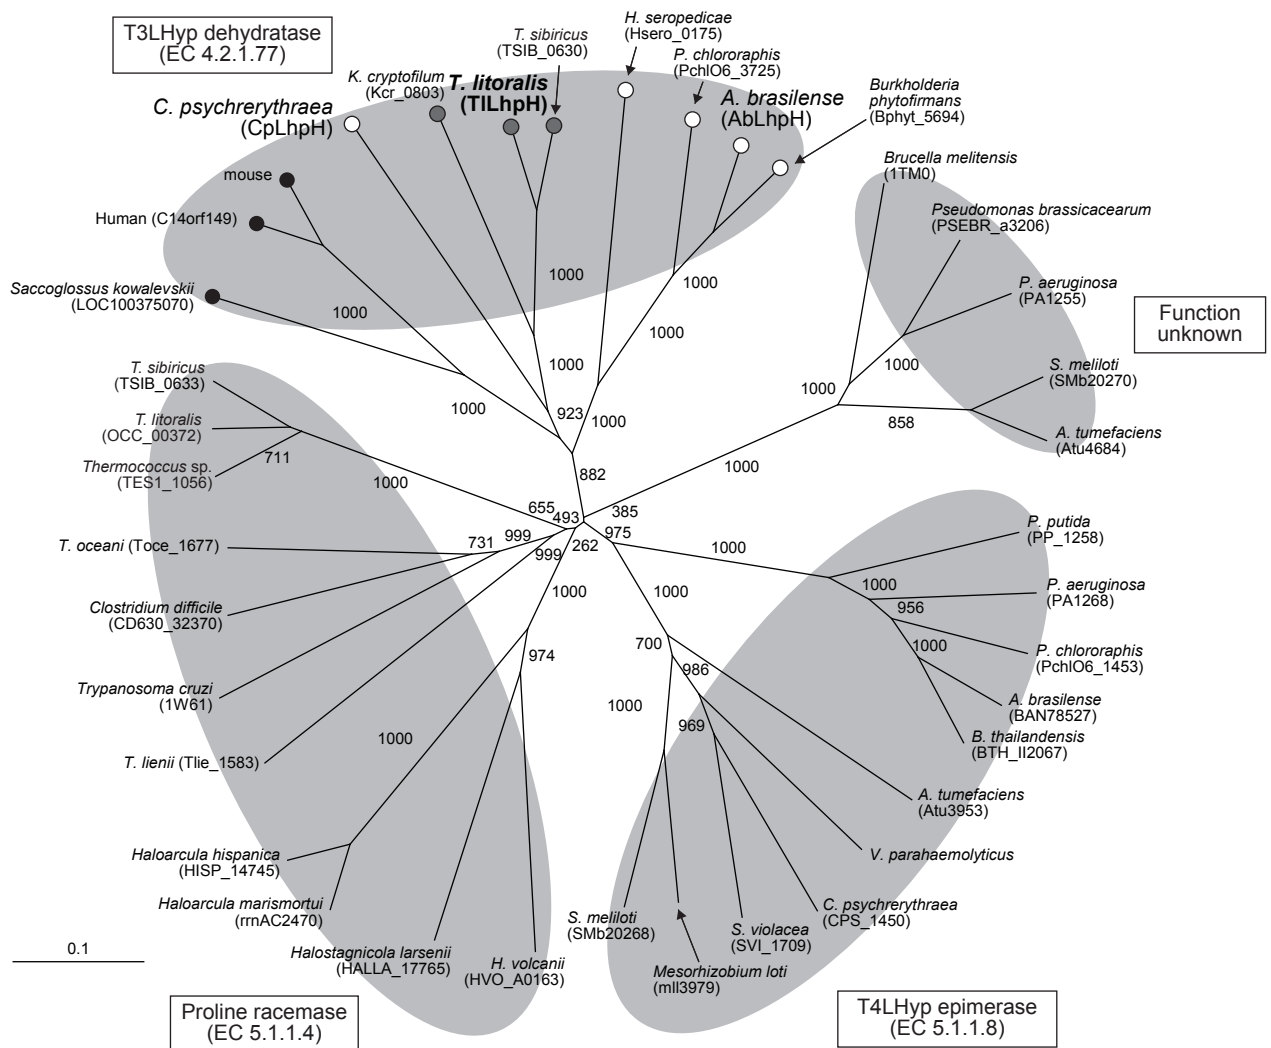

**B**

|                               |                                      |       |       |        |      |        |          |
|-------------------------------|--------------------------------------|-------|-------|--------|------|--------|----------|
| T3LHyp dehydratase            | <i>T. litoralis</i> (OCC_00387)      | 99    | GYSTM | CGHATI | 264  | DRSP   | EGTGVS   |
|                               | <i>T. sibiricus</i> (TSIB_0630)      | 102   | GYSTM | CGHATI | 267  | DRSP   | EGTGVSG  |
|                               | <i>K. cryptofilum</i> (kcr_0803)     | 98    | GYSTG | CGHAVI | 263  | DRCP   | EGTGVS   |
|                               | <i>A. brasilense</i> (BAO2I621)      | 86    | GYSDH | CGHGV  | 251  | DRSP   | EGSGTGG  |
|                               | <i>C. psychrerythraea</i> (CPS_1453) | 106   | GYSSM | CGHAV  | 271  | DRSP   | EGSGVSG  |
| T4LHyp epimerase              | Human (C14orf149)                    | 99    | GYSSM | CGHAVL | 269  | DRSP   | EGSGVTA  |
|                               | <i>A. brasilense</i> (AN78527)       | 83    | GYLGM | CGHGTI | 232  | DRSP   | CGTGTSA  |
|                               | <i>C. psychrerythraea</i> (CPS_1450) | 53    | GCLPM | CGHGTI | 217  | DRSP   | CGTGTSA  |
|                               | <i>P. aeruginosa</i> (PA1268)        | 83    | GYLGM | CGHGTI | 232  | DRSP   | CGTGTSA  |
|                               | <i>P. putida</i> (PP1258)            | 83    | GYLNM | CGHGTI | 232  | DRSP   | CGTGTSA  |
| Proline racemase              | <i>S. meliloti</i> (CAC48658)        | 85    | GCLPM | CGHGTI | 249  | DRSP   | CGTGTSA  |
|                               | <i>T. litoralis</i> (OCC_00372)      | 83    | GYLDM | CGHATM | 247  | DRSP   | CGTGTSA  |
|                               | <i>T. sibiricus</i> (TSIB_0633)      | 83    | GYLDM | CGHATM | 247  | DRSP   | CGTGTSA  |
|                               | <i>T. sp.</i> (TES1_1056)            | 83    | GYLDM | CGHATM | 247  | DRSP   | CGTGTSA  |
|                               | <i>T. lienii</i> (Tlie_1583)         | 86    | EGVAM | CGHGST | 251  | DRSP   | CGTGTTC  |
| Function unknown              | <i>T. oceanii</i> (Toce_1677)        | 86    | GYLNM | CGHGST | 251  | DRSP   | CGTGTTS  |
|                               | <i>T. cruzi</i> (1W61)               | 125   | GYLNM | CGHNSI | 296  | DRSP   | CGTGTSA  |
|                               | <i>P. aeruginosa</i> (PA1255)        | 85    | DTPPM | SGSNSL | 252  | DRSP   | CGTGCSSA |
| <i>S. meliloti</i> (SMb20270) | 85                                   | DTPPM | SGSNS | 252    | DRSP | CGTALS |          |

**FIGURE S1.** Phylogenetic analysis of TILhpH. (A) Phylogenetic tree of proline racemase superfamily. The number on each branch indicates the bootstrap value. Proteins with black, white and gray-colored circles in T3LHyp dehydratase subfamily are from mammals, bacteria, and archaea (discovered in this study), respectively. (B) Partial multiple sequence alignment of deduced amino acid sequences. Catalytic cysteine and/or threonine residues are shown as white letters in black boxes. Gray-shaded letters indicate highly conserved amino acid residues.
