# Supplementary material for: Ornithine cyclodeaminase/μ-crystallin homolog from the hyperthermophilic archaeon Thermococcus litoralis functions as a novel Δ1-pyrroline-2-carboxylate reductase involved in putative trans-3-hydroxy-l-proline metabolism
Source: PubMed Central journal article supplement — FEBS Open Bio. 2014 Jul 10;4:617–26. doi: 10.1016/j.fob.2014.07.005 (PMC4141209; doi:10.1016/j.fob.2014.07.005), 2014-07-10
Supplement: mmc3.pdf [file mmc3.pdf]

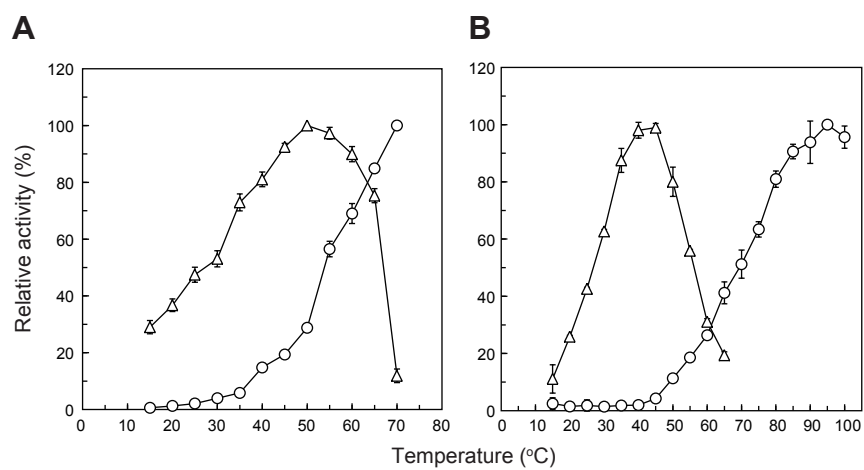

**FIGURE S2.** Temperature dependence of Pyr2C reductase (A) and T3LHyp dehydratase activities (B). Circle, each enzyme from *T. litoralis* (TILhpI and TILhpH); triangle, each enzyme from *A. brasilense* (AbLhpI and AbLhpH). Values are the means  $\pm$  SD, n = 3.
